# Supplementary material for: Molecular Characterization of Three Novel Phospholipase A2 Proteins from the Venom of Atheris chlorechis, Atheris nitschei and Atheris squamigera
Source: MDPI journal article supplement (doi:10.3390/toxins8060168), 2016-06-01
Supplement: s1 [file s1]

# Supplementary Materials: Molecular Characterization of Three Novel Phospholipase A<sub>2</sub> Proteins from the Venom of *Atheris chlorechis*, *Atheris nitschei* and *Atheris squamigera*

He Wang, Xiaole Chen, Mei Zhou, Lei Wang, Tianbao Chen and Chris Shaw

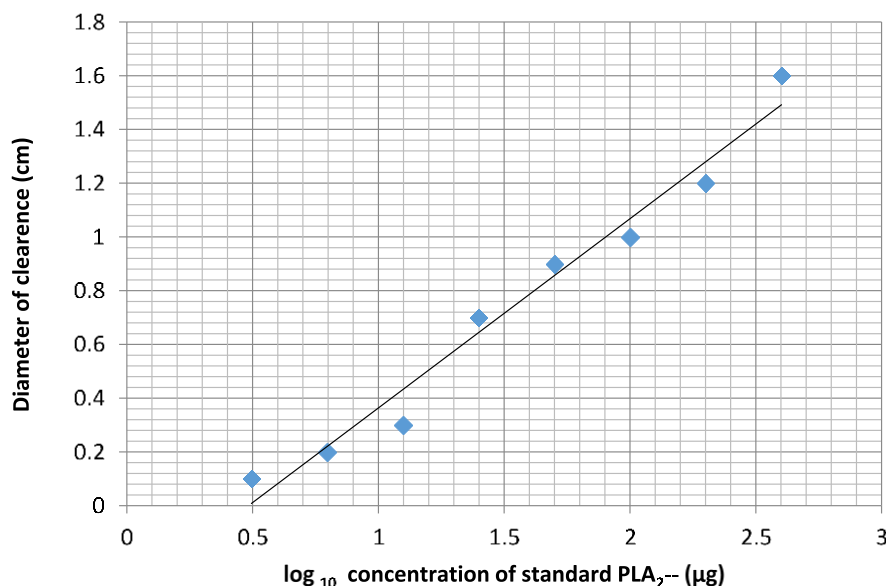

**Figure S1.** Dose-response curve of diameter of PLA<sub>2</sub> clearance zones against log<sub>10</sub> enzyme concentration of the standard PLA<sub>2</sub> from honey bee venom. Linear regression analysis was employed, and the regression equation ( $Y = 0.7039X - 0.34$ ) was obtained to analyze the equivalent PLA<sub>2</sub> content of sample venoms. The clearance zones of samples in the agarose/egg yolk suspension plate assay were used to estimate content of PLA<sub>2</sub>s in sample venom fractions. The results are summarized in Table S1.

**Table S1.** Clearance zones and corresponding estimated quantities of PLA<sub>2</sub> in sample venoms from *A. chlorechis*, *A. nitschei* and *A. squamigera*.

| Fraction Number      |     | Diameter of PLA <sub>2</sub> Clearance Zone (cm) | Predicted Content of PLA <sub>2</sub> in HPLC Fractions (μg) |
|----------------------|-----|--------------------------------------------------|--------------------------------------------------------------|
| <i>A. chlorechis</i> | 103 | 3.25                                             | 8.12                                                         |
|                      | 104 | 3.00                                             | 8.71                                                         |
| <i>A. nitschei</i>   | 106 | 4.75                                             | 14.45                                                        |
|                      | 107 | 5.00                                             | 15.49                                                        |
|                      | 108 | 5.75                                             | 19.95                                                        |
|                      | 109 | 6.00                                             | 21.88                                                        |
| <i>A. squamigera</i> | 105 | 2.50                                             | 6.92                                                         |
|                      | 106 | 3.00                                             | 8.12                                                         |
|                      | 107 | 2.50                                             | 6.92                                                         |
|                      | 113 | 3.25                                             | 8.71                                                         |
